# Supplementary material for: Lipoteichoic acid deficiency permits normal growth but impairs virulence of Streptococcus pneumoniae
Source: PubMed Central journal article supplement (PMC5727136; doi:10.1038/s41467-017-01720-z), 2017-12-12
Supplement: 41467_2017_1720_MOESM1_ESM.pdf [file 41467_2017_1720_MOESM1_ESM.pdf]

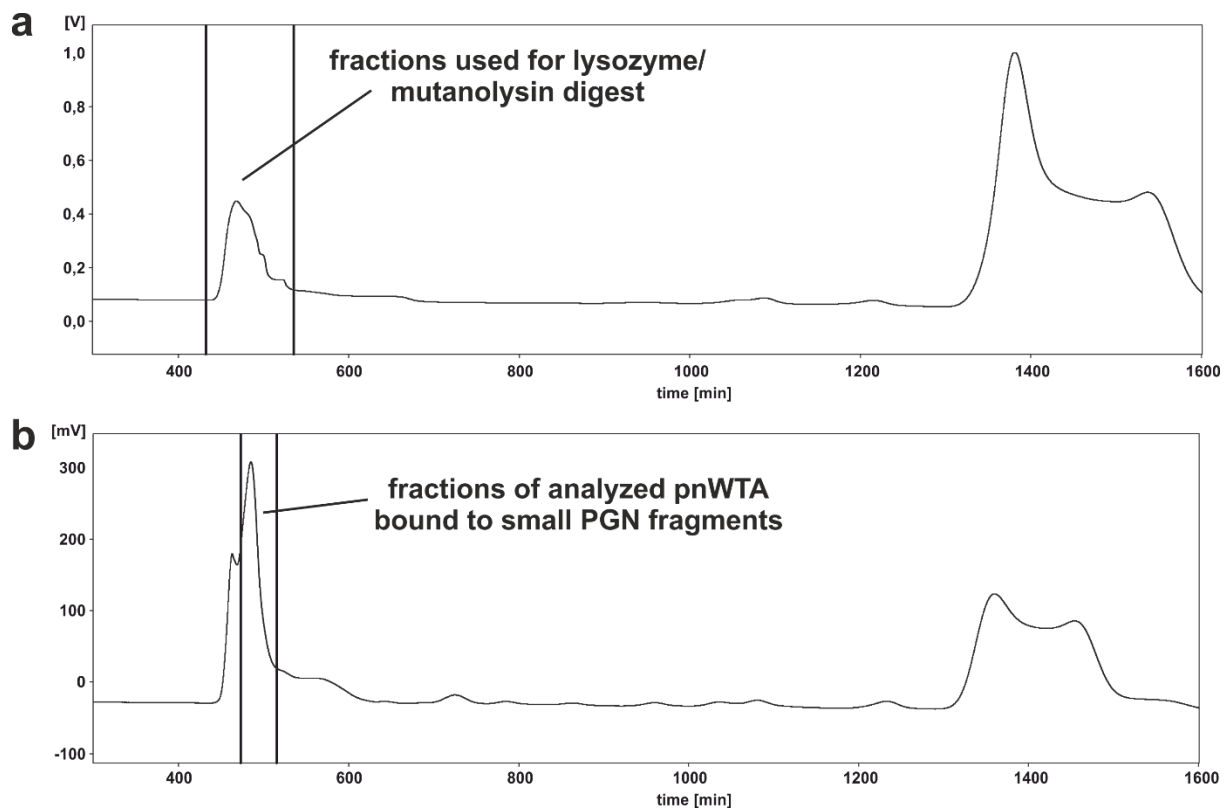

**Supplementary Figure 1. Gel permeation chromatography for the isolation of pnWTA bound to small PGN derived saccharides from *S. pneumoniae* D39 $\Delta$ cps $\Delta$ lgt.** Chromatogram of the GPC (Bio-Gel P-10 column, 150 mM ammonium acetate (pH 4.7)) of (a) the pnWTA-PGN complex after LytA-treatment. The indicated fractions were further used for lysozyme/mutanolysin digestion, which yield after a second GPC (b; same conditions as in (a)) a portion of pnWTA bound to small PGN derived saccharides, whose analysis is depicted in Fig. 1a-c and Supplementary Fig. 2.

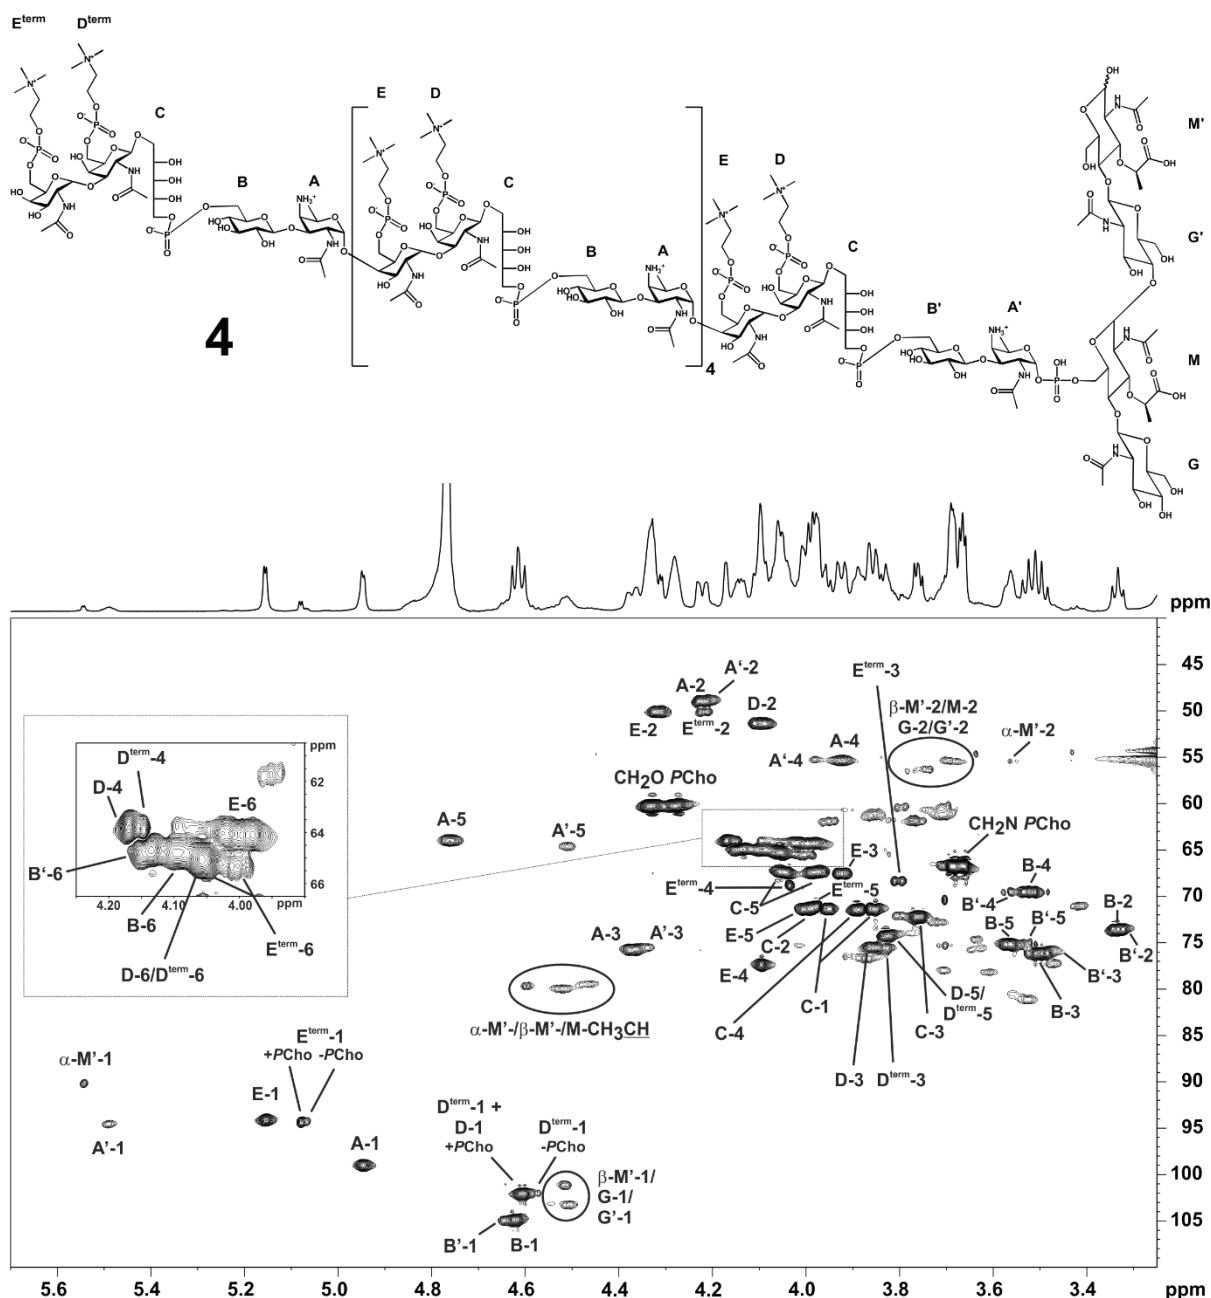

**Supplementary Figure 2.** Section ( $\delta_{\text{H}}$  5.70–3.25;  $\delta_{\text{C}}$  110–40) of the  $^1\text{H}$ ,  $^{13}\text{C}$ -HSQC NMR spectrum (700 MHz) obtained from pnWTA bound to small PGN saccharides isolated from *S. pneumoniae* D39 $\Delta$ cps $\Delta$ lgt. Mass spectrometric and further NMR analysis of the used material is depicted in Figs 1a–c. Detailed NMR chemical shift data are listed in Supplementary Table 1. Assignment of signals is exemplified on the structure of **4**, which was the major component in this preparation as identified by MS (Fig. 1a). Only a few PGN-derived signals (G, G', M, M') could specifically be assigned due to microheterogeneity of PGN part structures and their low intensity compared to pnWTA signals.

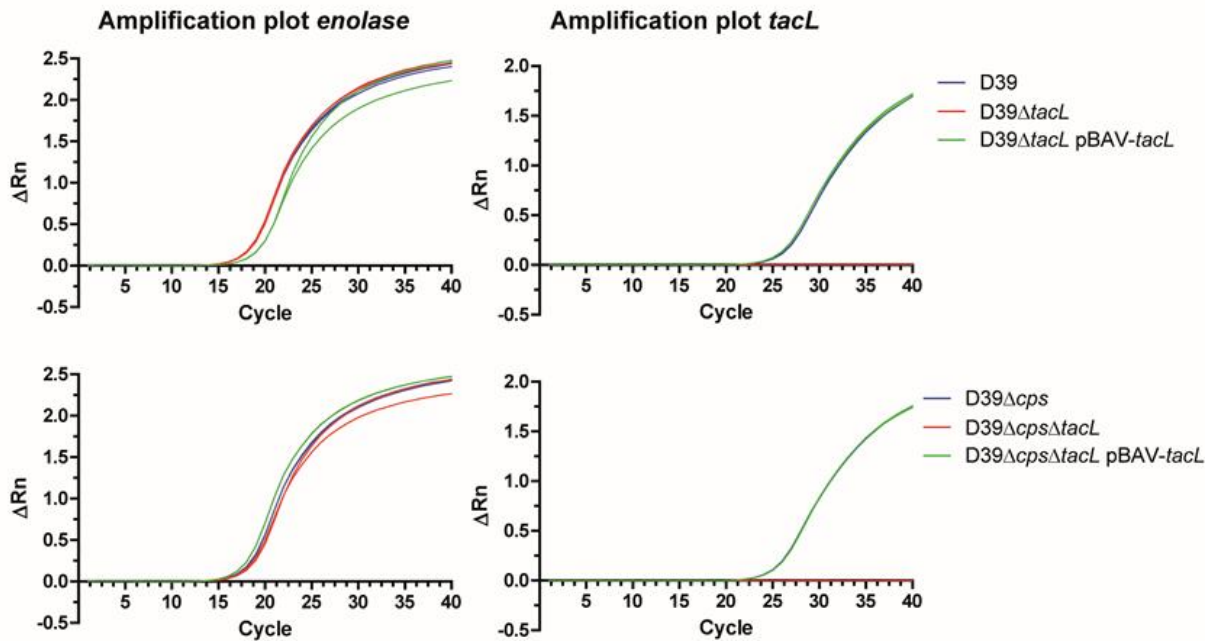

**Supplementary Figure 3: Real-time quantitative PCR (qRT-PCR).** To verify the *tacL* deletion and complementation, encapsulated and nonencapsulated *S. pneumoniae* D39, D39Δ*tacL* and the complemented D39Δ*tacL* mutant were grown in THY until mid-log phase. After RNA-isolation and cDNA synthesis using random DNA hexamer primers, *tacL* was amplified by PCR using primer qP\_tacL\_F and qP\_tacL\_R (see Supplementary Table 2). Each strain was analyzed in duplicate (2 lines per strain in the diagram). The *enolase* gene was used as control.

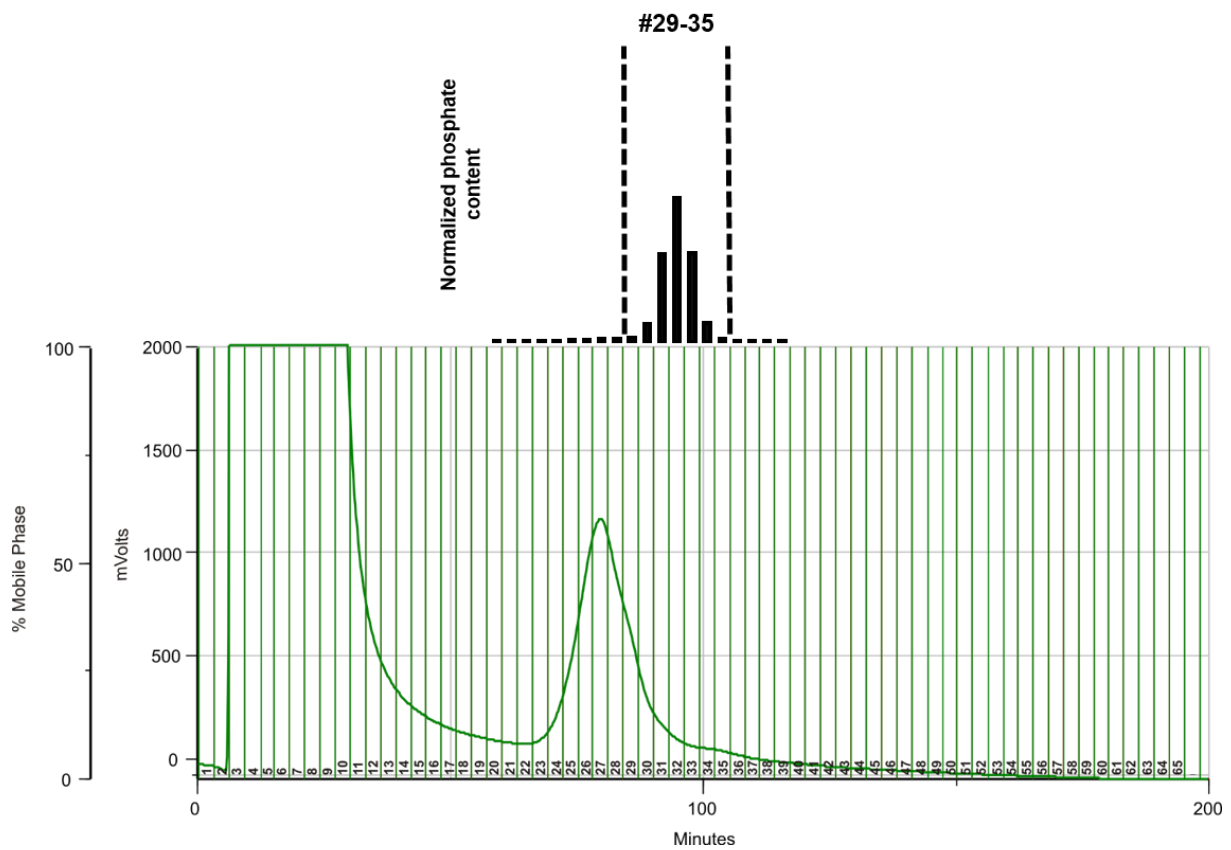

**Supplementary Figure 4. Representative chromatogram of the hydrophobic interaction chromatography (HIC) of D39 $\Delta$ *cps* LTA including normalized visualization of the phosphate content of the selected fractions.** The fractions #29-35 were combined on the basis of the phosphate content and contain the LTA. The main UV active signals in fractions #23-40 are caused by non-LTA species such as lipoproteins. For *tacl* mutants the phosphate content of these fractions was zero. However, for  $^{31}\text{P}$  NMR measurements shown in Figs 2b,e the usually LTA containing fractions were pooled and used.

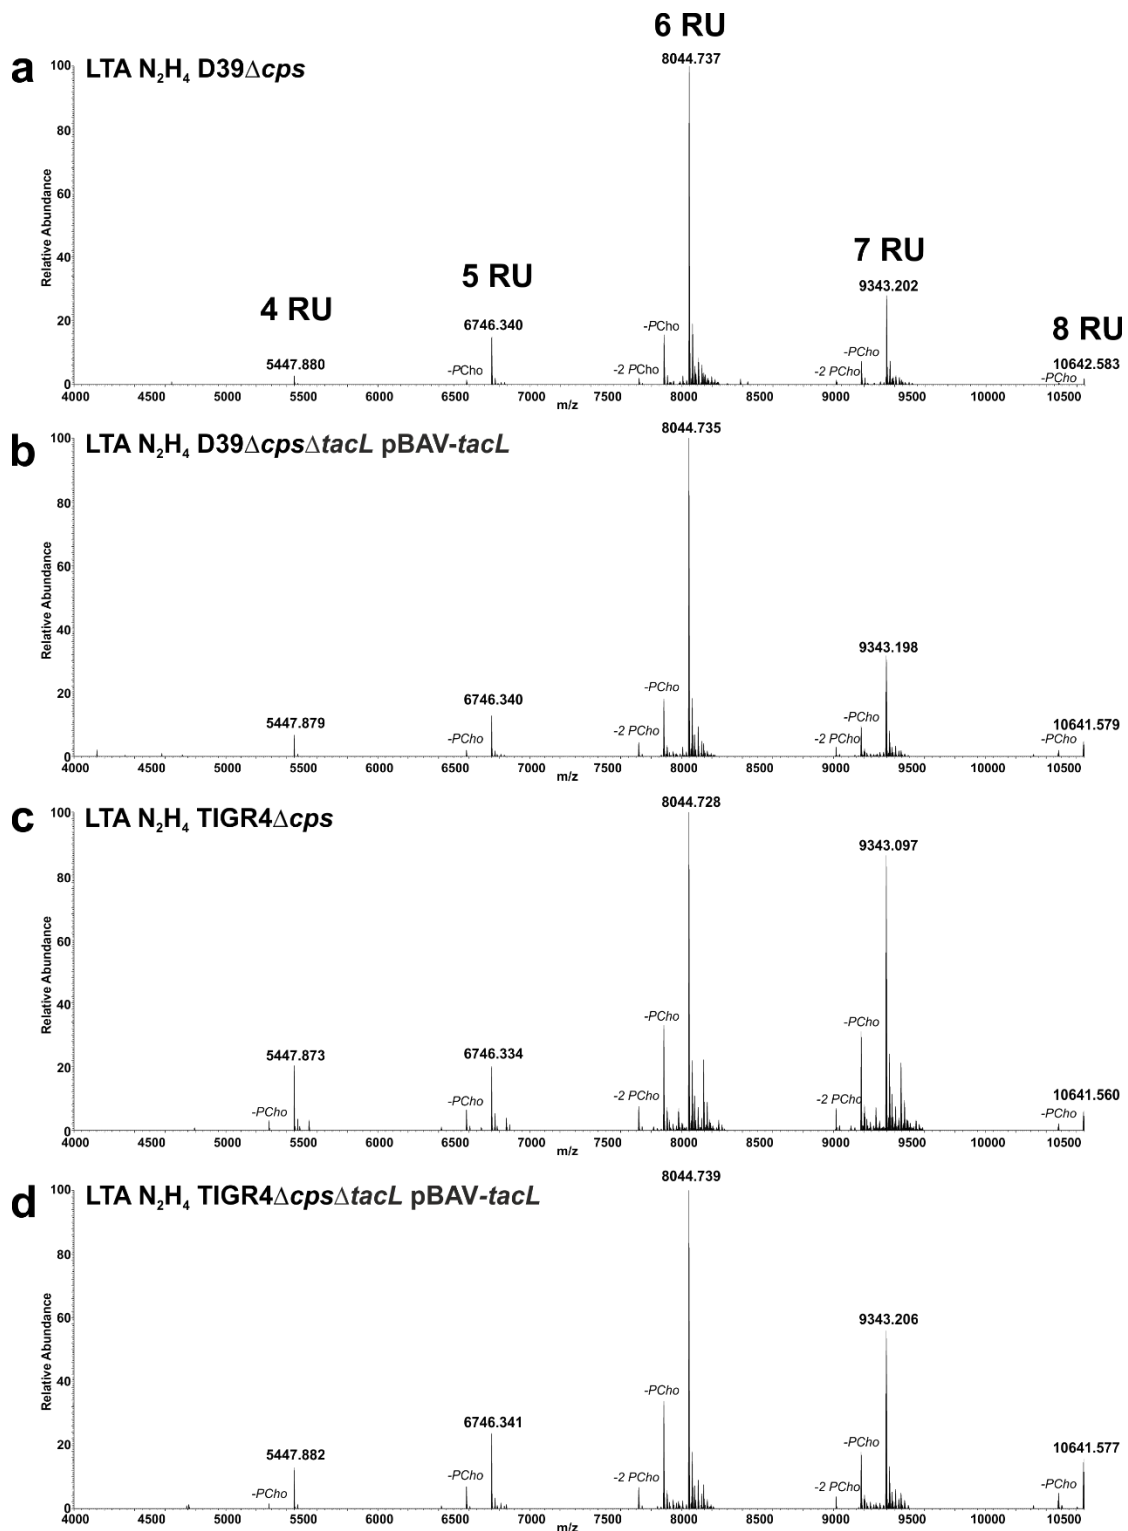

**Supplementary Figure 5. Section of charge deconvoluted mass spectra (acquired in negative ion mode) of hydrazine-treated LTA of *S. pneumoniae* LTA.** Shown are the mass spectra for pnLTA after hydrazine treatment isolated from strain (a) D39Δ*cps*, (b) D39Δ*cps*Δ*tacl* pBAV-*tacl*, (c) TIGR4Δ*cps*, and (d) TIGR4Δ*cps*Δ*tacl* pBAV-*tacl*. The monoisotopic mass of 5447.889 Da (calculated) corresponds to de-O-acylated pnLTA with n = 2 (structure shown in Fig. 1d), the assigned higher masses to respective molecules with longer chains (6746.336 Da (n = 3); 8044.783 Da (n = 4); 9343.231 Da (n = 5); 10641.678 Da (n = 6)).

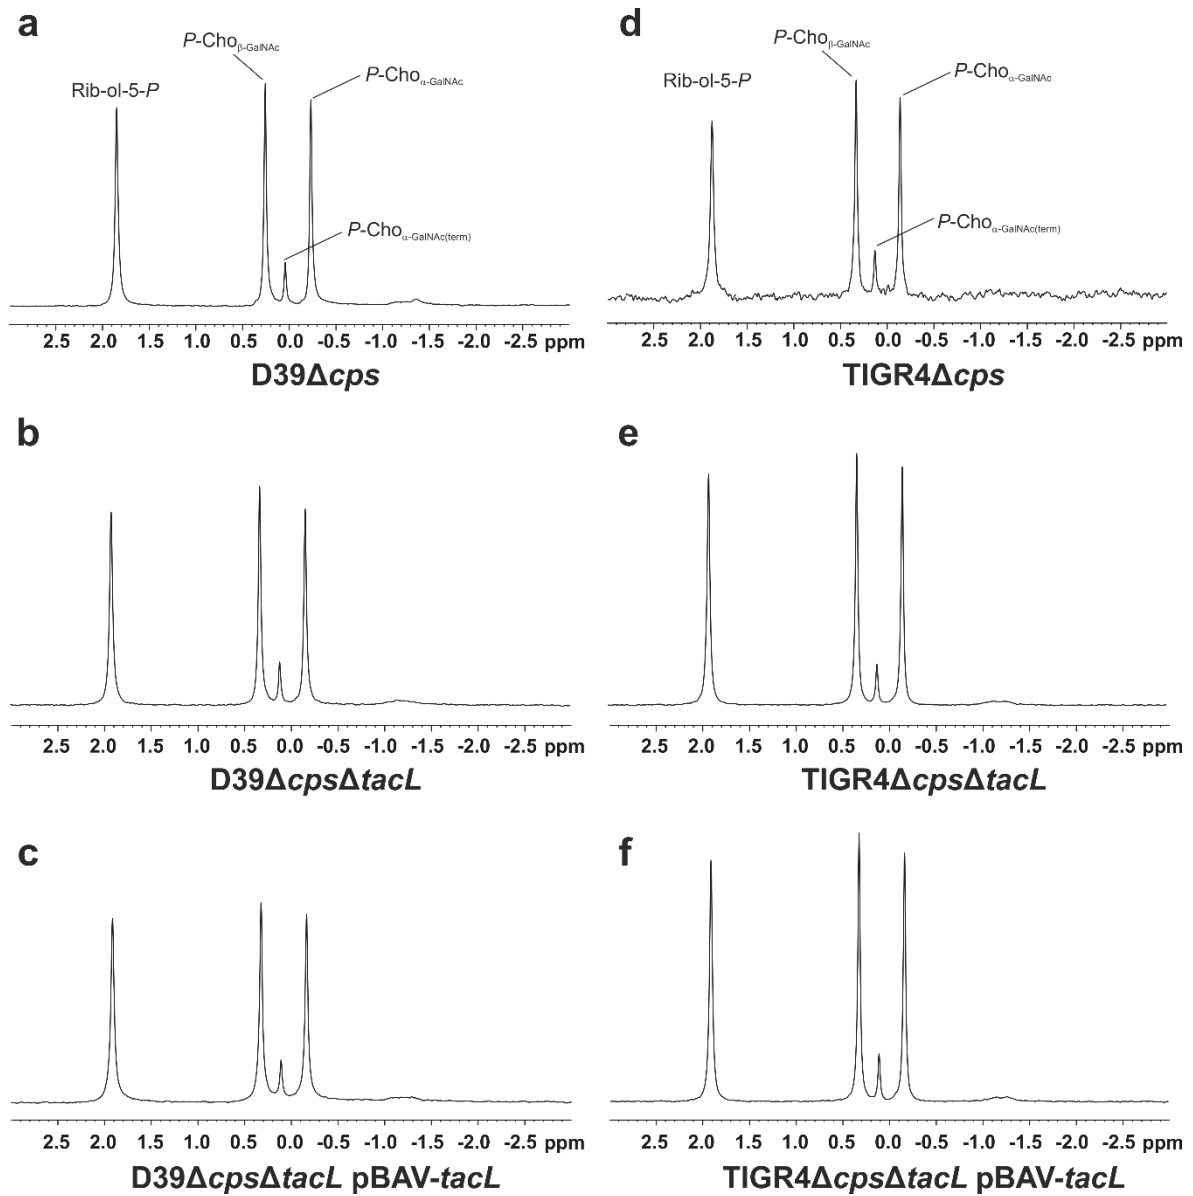

**Supplementary Figure 6.  $^{31}\text{P}$  NMR spectra of LytA-treated PGN-pnWTA complex.** Sections of  $^{31}\text{P}$  NMR ( $\delta_{\text{P}}$  (3-(-3))) of the PGN-pnWTA complex after LytA-treatment and GPC purification isolated from D39 strains (**a**) *D39Δcps*, (**b**) *D39ΔcpsΔtacL*, (**c**) *D39ΔcpsΔtacL pBAV-tacL* and TIGR4 strains (**d**) *TIGR4Δcps*, (**e**) *TIGR4ΔcpsΔtacL* and (**f**) *TIGR4ΔcpsΔtacL pBAV-tacL*.

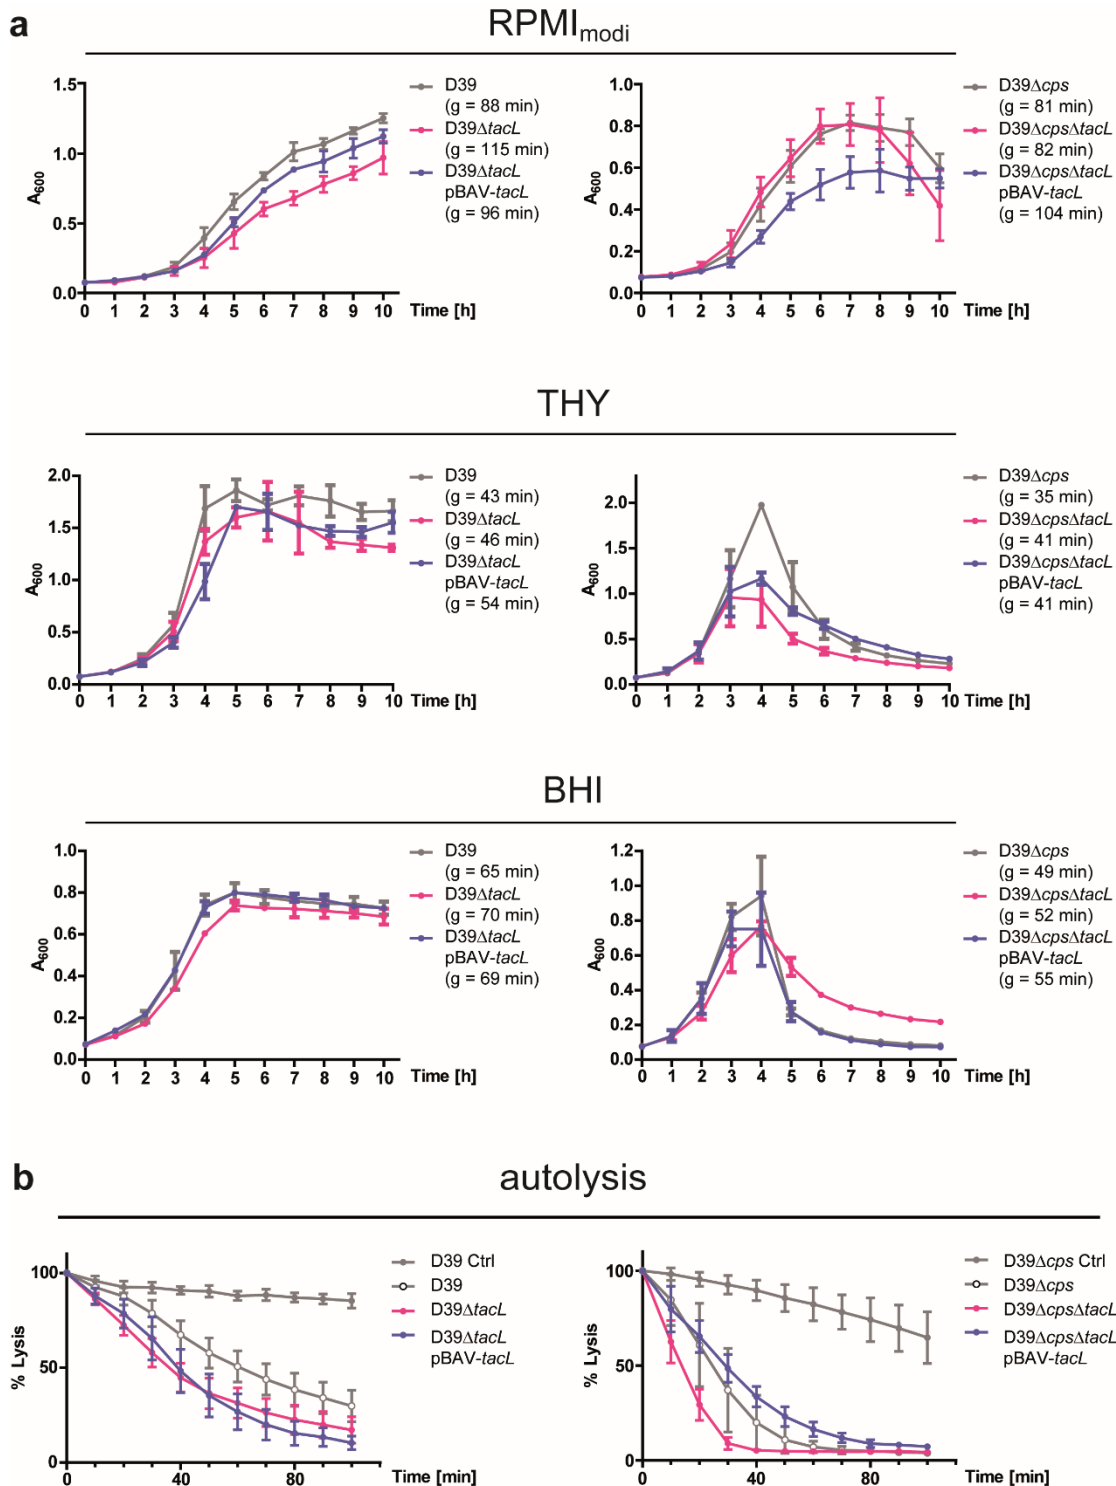

**Supplementary Figure 7: Pneumococcal growth curves and autolysis.** (a) Growth curves of nonencapsulated ( $\Delta cps$ ) *S. pneumoniae* D39 and encapsulated D39 wild-type, isogenic  $\Delta tacL$  mutant as well as complemented mutant ( $\Delta tacL$  pBAV- $tacL$ ) strains in chemically-defined medium (RPMI<sub>modi</sub>) and complex media (Todd-Hewitt broth + 0.5% yeast (THY) or brain heart infusion broth (BHI)). Absorbance at 600 nm was measured at different time points. g = generation time. (b) For the Triton X-100 induced autolysis assay, pneumococci were grown to mid-log phase, harvested and resuspended in PBS containing 0.01% Triton X-100 ( $A_{600} = 1$ ). Bacterial lysis was monitored by measuring the absorbance at 600 nm. Error bars represent means  $\pm$  s.d. of at least three independent experiments.

## FESEM

## TEM

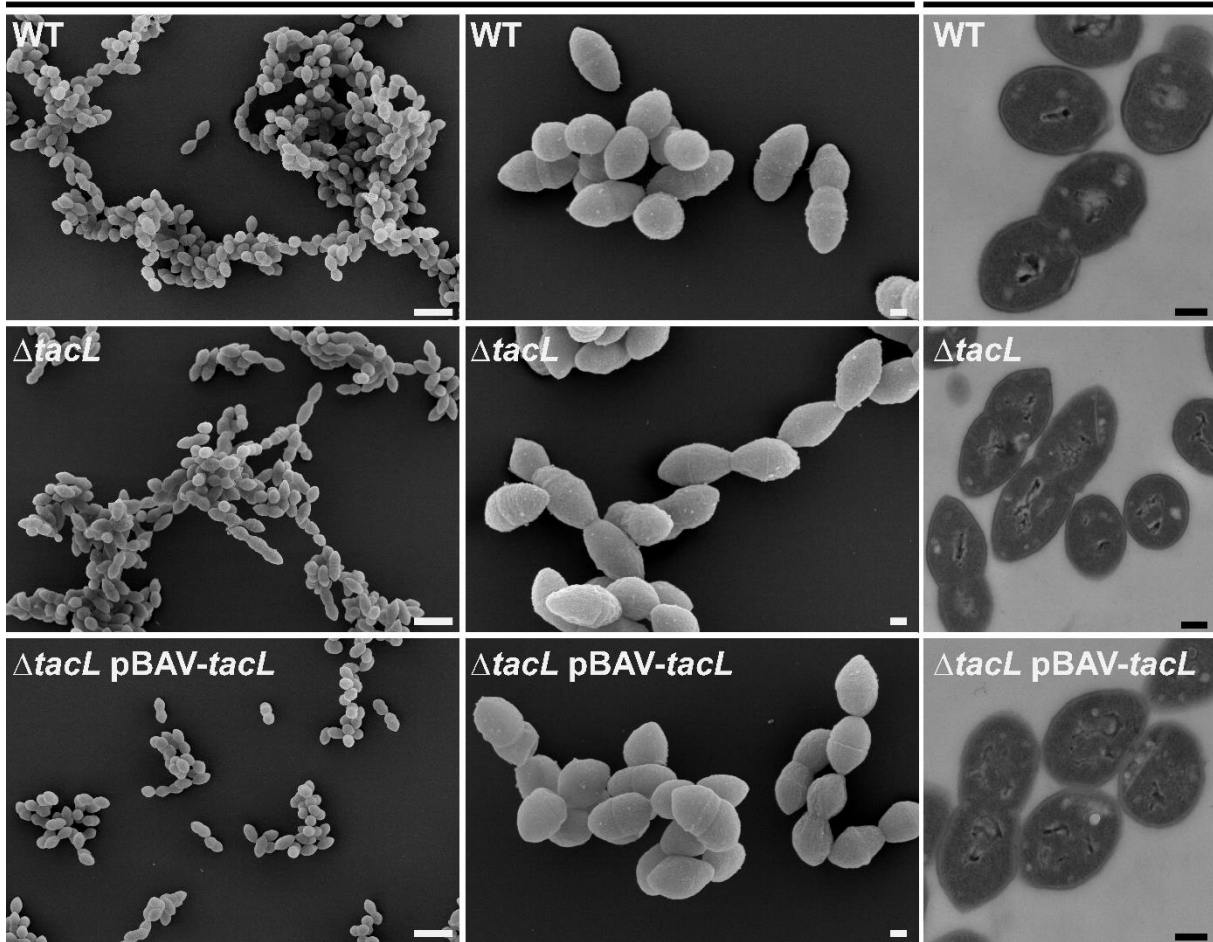

**Supplementary Figure 8: Analysis of pneumococcal cell morphology and cell division by electron microscopy.** FESEM and TEM ultrathin sections revealed no visible differences in the cell morphology and cell division septa morphology between nonencapsulated D39 wild-type (WT), *tacL* mutant ( $\Delta tacL$ ) or complemented mutant ( $\Delta tacL$  pBAV-*tacL*) grown in chemically-defined medium (RPMI<sub>modi</sub>). Scale bars = 2  $\mu$ m (FESEM, left panel), 0.2  $\mu$ m (FESEM, right panel), 0.2  $\mu$ m (TEM).



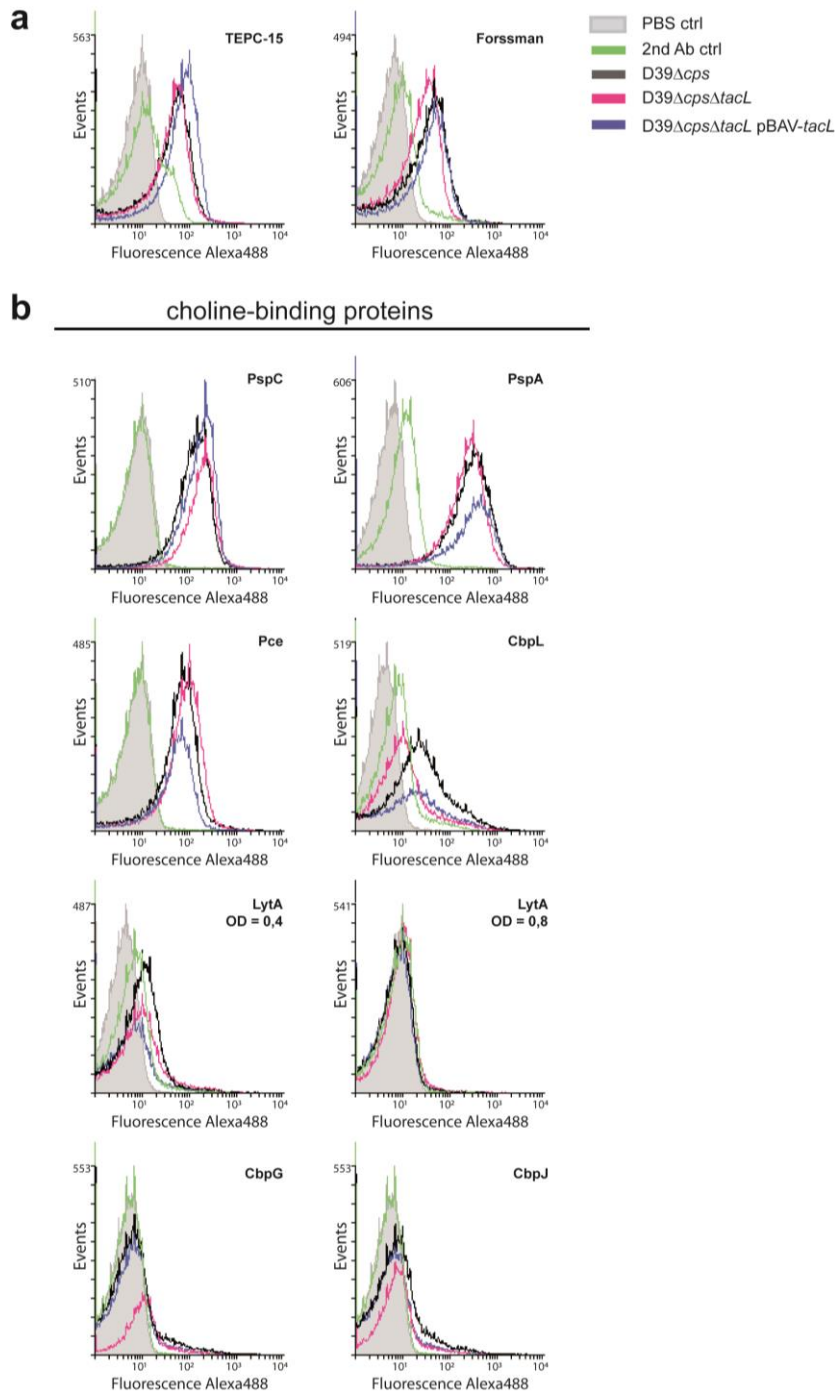

**Supplementary Figure 9: Representative histograms of the quantitative analysis of teichoic acids and choline-binding proteins.** Bacteria were grown in THY-medium to  $A_{600} = 0.35-0.45$  (for LytA 0.4 and 0.8), washed and incubated with antibodies. **(a)** The amount of *P*-Cho and Forssman antigen of teichoic acids were determined using specific primary antibodies (TEPC-15, anti-Forssman) and secondary Alexa<sub>488</sub>-labeled antibody in a flow cytometry based assay. **(b)** Surface associated CBPs were analyzed using specific polyclonal mice IgG against the individual CBPs and secondary Alexa<sub>488</sub>-labeled antibodies in a flow cytometry based assay.

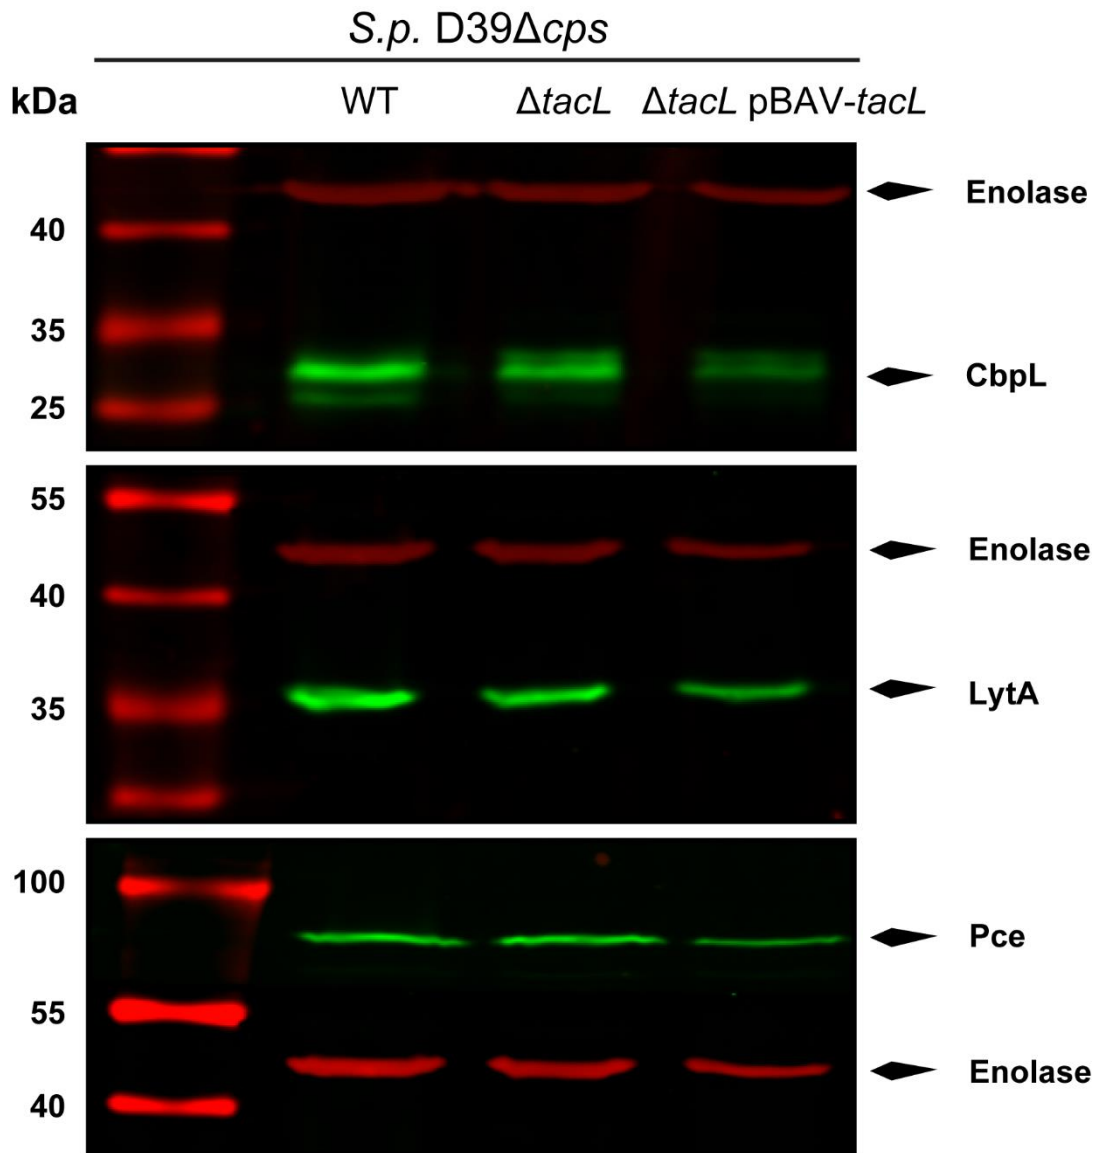

**Supplementary Figure 10: Expression analysis of choline-binding proteins.** Bacteria were grown in THY to  $A_{600} = 0.35-0.45$ , harvested by centrifugation and lysates were resuspended in PBS.  $2 \times 10^8$  cells/well were loaded for each strain for SDS-PAGE and surface associated CBPs were analyzed by immunoblot using specific polyclonal mice IgG against single proteins and secondary fluorescence labeled IRDye<sup>®</sup> 800CW (LI-COR) Goat  $\alpha$ -mouse IgG antibody. Specific polyclonal rabbit IgG against Enolase and secondary fluorescence labeled IRDye<sup>®</sup> 680RD (LI-COR) Goat  $\alpha$ -rabbit IgG antibody were used as loading control.

**a**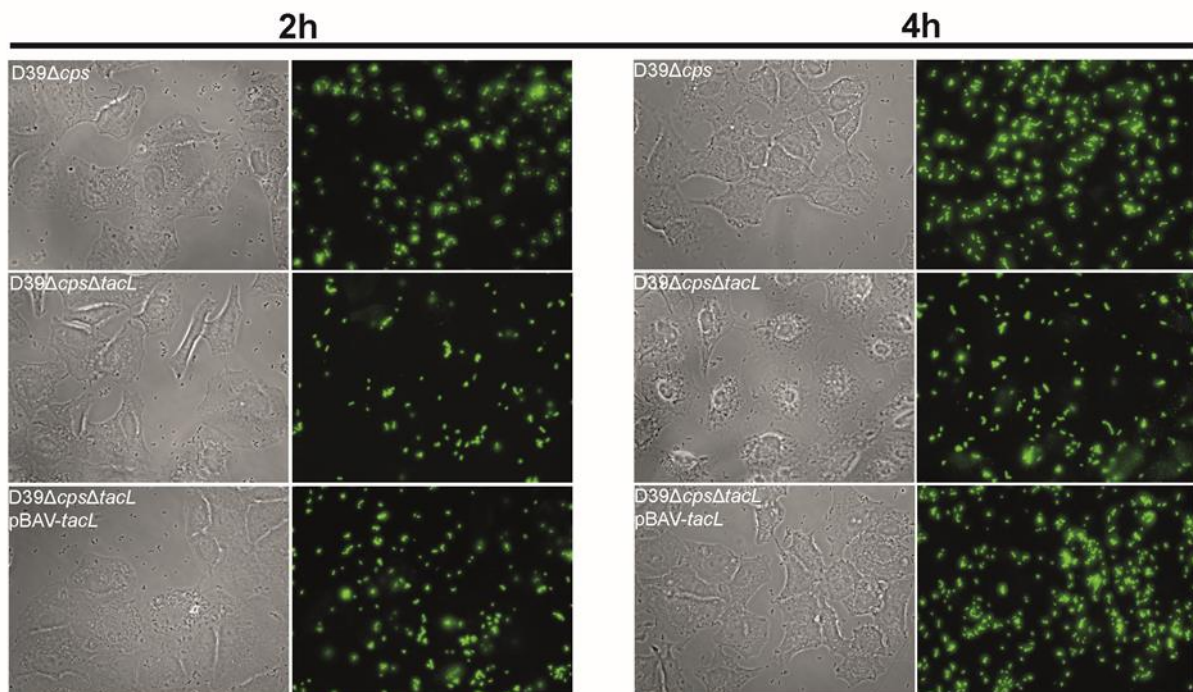**b**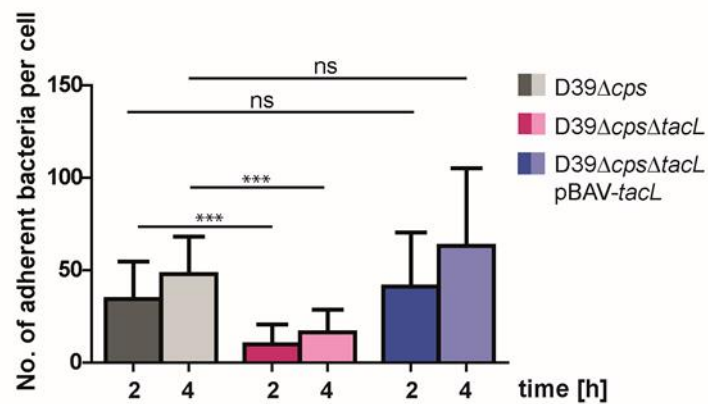

**Supplementary Figure 11: Pneumococcal adherence to epithelial cells. (a)** Fluorescence microscopy of adhered *S. pneumoniae* D39 $\Delta$ *cps*, D39 $\Delta$ *cps* $\Delta$ *taeL* or D39 $\Delta$ *cps* $\Delta$ *taeL* pBAV-*taeL* to A549 human lung epithelial cells. Approximately  $1 \times 10^5$  cells were infected with  $5 \times 10^6$  pneumococci and incubated for 2 h or 4 h. Bacteria were stained using a polyclonal antibody (1:500) against pneumococci and a secondary antibody (fluorescence-labeled Alexa Fluor<sub>488</sub>, 1:500). Magnification 630x. **(b)** Adhered bacteria were counted by immunofluorescence microscopy (20 cells/ glass coverslip). Values represent means  $\pm$  s.d. of at least three independent experiments. ns = not significant, \*\*\* $p < 0.001$  (Unpaired two-tailed Student's *t* test).

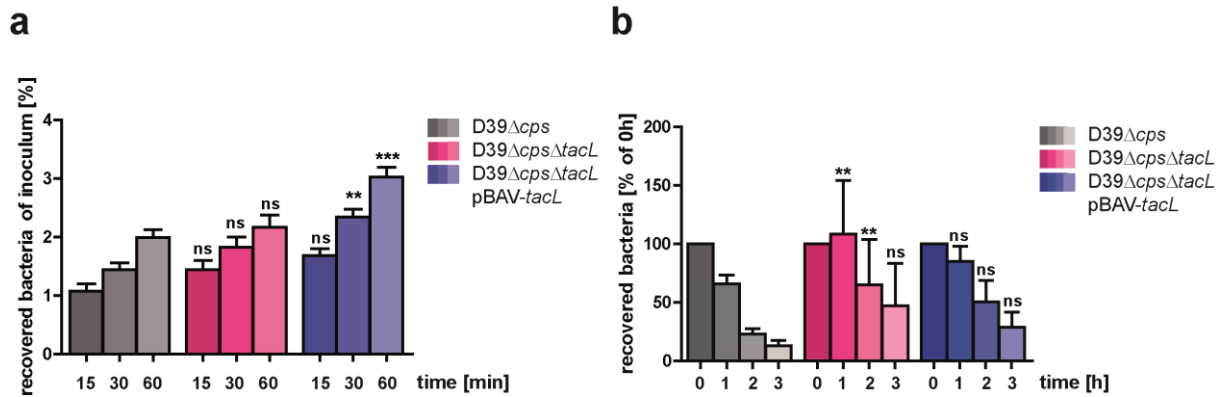

**Supplementary Figure 12: Pneumococcal infection of human THP-1 cells. (a) Bacterial uptake by phagocytes.** PMA-differentiated THP-1 cells were infected with nonencapsulated *S. pneumoniae* D39 $\Delta$ cps, D39 $\Delta$ cps $\Delta$ tacl or D39 $\Delta$ cps $\Delta$ tacl pBAV-tacL. Post infection, extracellular pneumococci were killed at pre-chosen time points by the addition of Gentamicin and Penicillin and living intracellular bacteria were recovered and enumerated by plating of cell lysates on blood agar plates. **(b) Time-dependent killing of intracellular pneumococci.** To visualize the killing of intracellular pneumococci, THP-1 cells were infected for 60 minutes. Extracellular pneumococci were killed by antibiotics and the incubation was continued in infection medium without antibiotics. At different time-points post infection, the number of intracellular cfu was determined by lysis of the THP-1 cells and plating of cell lysates on blood agar plates. Values represent means  $\pm$  s.d. of at least three independent experiments. ns = not significant, \*\* $p < 0.01$ ; \*\*\* $p < 0.001$  (One-way Anova with Bonferroni correction).

**a****extracellular/ intracellular**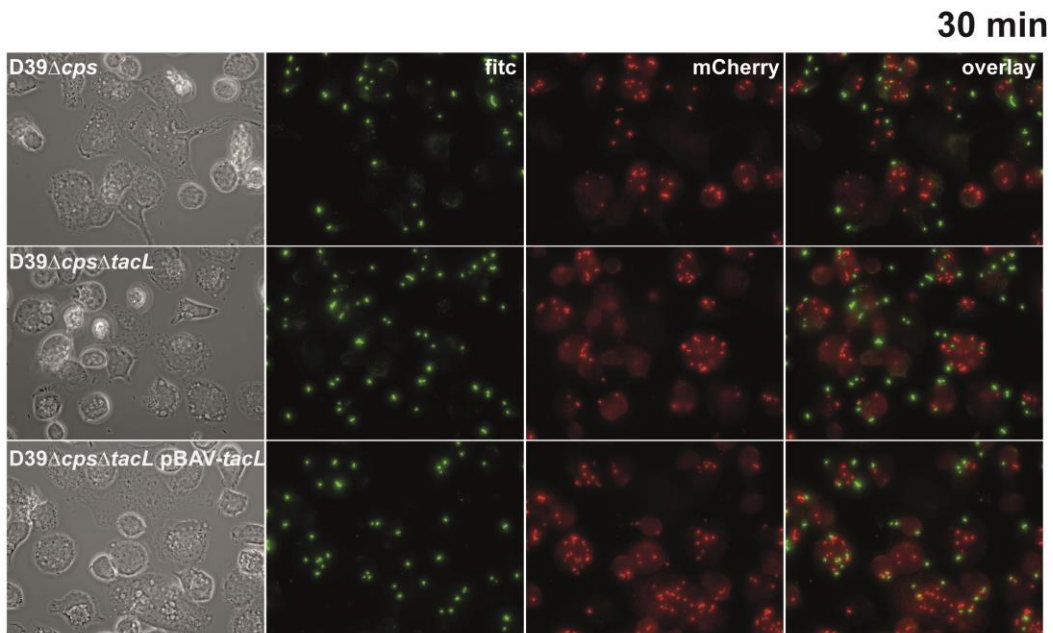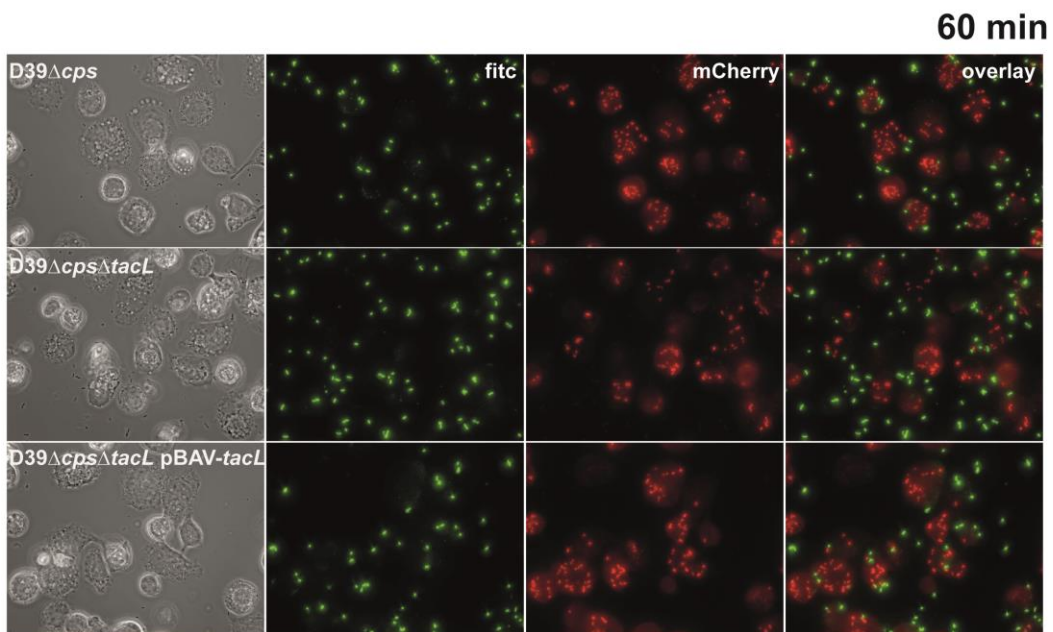**b**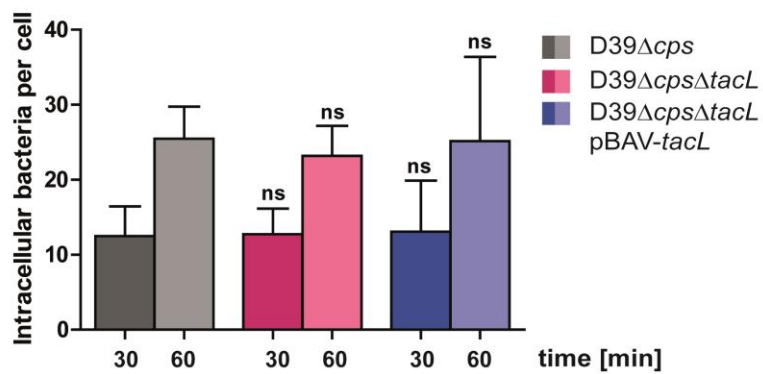

**Supplementary Figure 13: Bacterial uptake by phagocytes and double immunofluorescence staining.**

**(a)** Time-dependent uptake of nonencapsulated *S. pneumoniae* D39 $\Delta$ *cps*, D39 $\Delta$ *cps* $\Delta$ *tacl* or D39 $\Delta$ *cps* $\Delta$ *tacl* pBAV-*tacl* by PMA-differentiated THP-1 cells was monitored at different time points using double immunofluorescence staining. Extracellular pneumococci were stained using a polyclonal anti-pneumococcal antibody and Alexa Fluor<sub>488</sub> labeled secondary antibody (1:500, green, measured using the fitc channel). After permeabilization of THP-1 cells using 0.1% Triton-X 100, intracellular bacteria (red) were labeled using polyclonal anti-pneumococcal antibody and Alexa Fluor<sub>568</sub> labeled secondary antibody (1:500, measured using the mCherry channel). Magnification 630x. **(b)** Intracellular bacteria were counted by immunofluorescence microscopy (50 cells/ glass coverslip). Values represent means  $\pm$  s.d. of at least three independent experiments. ns = not significant, \* $p < 0.05$  (One-way Anova with Bonferroni correction).



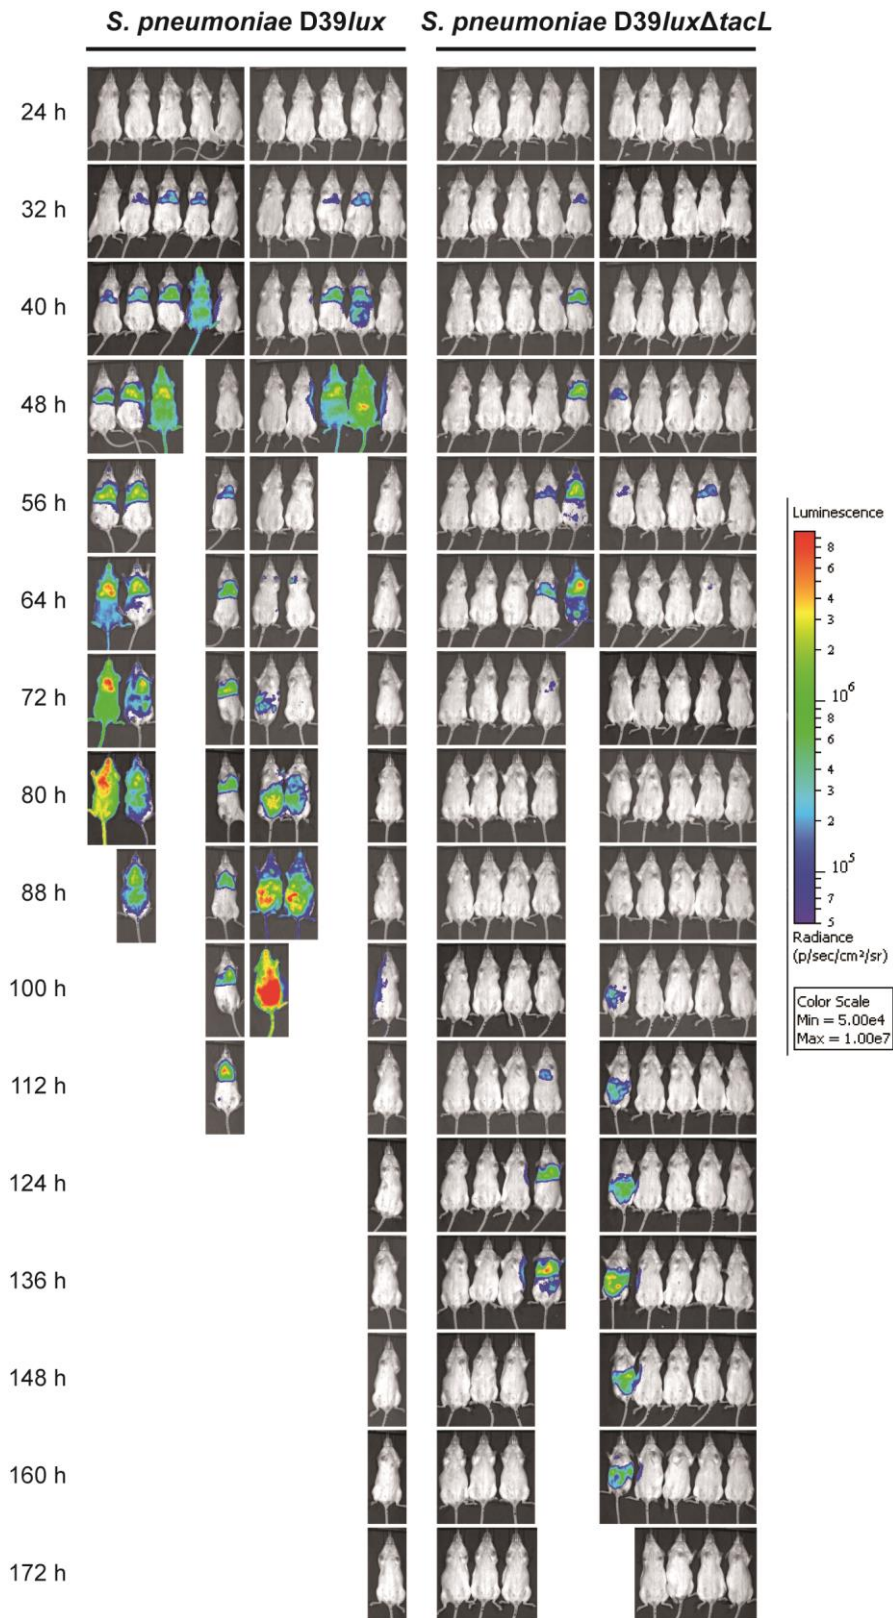

**Supplementary Figure 14: Impact of *TacL* on pneumococcal virulence in the acute pneumonia model.** Real-time monitoring of mice ( $n = 10$ ) intranasally infected with  $\sim 2.5 \times 10^7$  bioluminescent *S. pneumoniae* D39*lux* wild-type or D39*lux*Δ*tacl*. Pneumococcal dissemination was monitored at indicated time points by determination of the luminescence intensity (photons/second) measured with the IVIS® Spectrum system.

**Supplementary Table 1.**  $^1\text{H}$  (700.4 MHz),  $^{13}\text{C}$  NMR (176.1 MHz), and  $^{31}\text{P}$  NMR (283.5 MHz) chemical shift data ( $\delta$ , ppm) [ $J$ , Hz] of pnWTA bound to small PGN saccharides from *S. pneumoniae* D39 $\Delta$ cps $\Delta$ lgt. (respective structure including assignment of residues as well as corresponding  $^1\text{H}$ ,  $^{13}\text{C}$ -HSQC-NMR spectrum shown in Supplementary Fig. 2). \*non-resolved multiplet; without *P*-Cho:  $^{\S}4.58$  [8.5], 101.9;  $^{\S\S}5.07$  [3.8], 94.1.

| Residue<br>(assignment)                                                                                 | H-1<br>C-1                                                                                                                                                                                                                                                                                                                              | H-2<br>C-2         | H-3<br>C-3         | H-4<br>C-4         | H-5<br>C-5                             | H-6<br>C-6                             | NAc                   |
|---------------------------------------------------------------------------------------------------------|-----------------------------------------------------------------------------------------------------------------------------------------------------------------------------------------------------------------------------------------------------------------------------------------------------------------------------------------|--------------------|--------------------|--------------------|----------------------------------------|----------------------------------------|-----------------------|
| $\rightarrow$ 3)- $\alpha$ -AATGalp-(1 $\rightarrow$ P (A'))                                            | 5.51-5.47*<br>94.4 [5.5]                                                                                                                                                                                                                                                                                                                | 4.23-4.18*<br>48.6 | 4.37-4.32*<br>75.3 | 4.00-3.96*<br>55.1 | 4.53-4.49*<br>64.4                     | 1.38-1.33*<br>16.8                     | 2.07<br>22.8<br>175.5 |
| <i>P</i> $\rightarrow$ 6)- $\beta$ -D-Glcp-(1 $\rightarrow$ (B'))                                       | 4.66-4.62*<br>104.8                                                                                                                                                                                                                                                                                                                     | 3.35-3.30*<br>73.2 | 3.50-3.45*<br>75.7 | 3.57-3.51*<br>69.3 | 3.56-3.51*<br>75.0                     | 4.16-4.12*<br>64.9-64.7*               |                       |
| $\rightarrow$ 1)-ribitol-(5 $\rightarrow$ P (C))                                                        | 3.97-3.93*<br>3.87-3.83*<br>71.2                                                                                                                                                                                                                                                                                                        | 4.02-3.97*<br>71.2 | 3.78-3.74*<br>72.0 | 3.91-3.87*<br>71.3 | 4.07-4.02*<br>4.00-3.95*<br>67.2 [5.4] |                                        |                       |
| $\rightarrow$ 3)- $\beta$ -D-6- <i>O</i> - <i>P</i> -Cho-GalpNAc (1 $\rightarrow$ (D))                  | 4.63-4.58*<br>101.9                                                                                                                                                                                                                                                                                                                     | 4.13-4.06*<br>51.2 | 3.88-3.83*<br>75.3 | 4.19-4.15*<br>63.8 | 3.85-3.81*<br>74.1 [8.1]               | 4.09-4.03*<br>65.1 [4.8]               | 2.08<br>23.0<br>175.4 |
| $\rightarrow$ 4)- $\alpha$ -D-6- <i>O</i> - <i>P</i> -Cho-GalpNAc (1 $\rightarrow$ (E))                 | 5.16 [3.5]<br>93.9                                                                                                                                                                                                                                                                                                                      | 4.34-4.30*<br>49.9 | 3.94-3.91*<br>67.4 | 4.11-4.08*<br>77.2 | 4.02-3.98*<br>71.3                     | 4.04-3.96*<br>64.3-64.1*               | 2.05<br>22.5<br>175.3 |
| $\rightarrow$ 3)- $\alpha$ -AATGalp-(1 $\rightarrow$ (A))                                               | 4.95 [3.4]<br>98.8                                                                                                                                                                                                                                                                                                                      | 4.26-4.20*<br>48.8 | 4.39-4.34*<br>75.6 | 3.95-3.89*<br>55.2 | 4.79-4.73*<br>63.8                     | 1.23 [6.4]<br>16.4                     | 2.10<br>22.4<br>175.2 |
| <i>P</i> $\rightarrow$ 6)- $\beta$ -D-Glcp-(1 $\rightarrow$ (B))                                        | 4.64-4.60*<br>104.7                                                                                                                                                                                                                                                                                                                     | 3.35-3.31*<br>73.4 | 3.52-3.47*<br>76.0 | 3.55-3.50*<br>69.3 | 3.59-3.54*<br>75.0 [7.9]               | 4.11-4.02*<br>64.9-64.7*               |                       |
| $\rightarrow$ 3)- $\beta$ -D-6- <i>O</i> - <i>P</i> -Cho-GalpNAc (1 $\rightarrow$ (D <sup>term</sup> )) | 4.63-4.58* <sup>\S</sup><br>101.9                                                                                                                                                                                                                                                                                                       | 4.13-4.06*<br>51.2 | 3.85-3.81*<br>75.4 | 4.16-4.13*<br>63.9 | 3.85-3.81*<br>74.1                     | 4.09-4.03*<br>65.1 [4.8]               | 2.08<br>23.0<br>175.4 |
| $\rightarrow$ 4)- $\alpha$ -D-6- <i>O</i> - <i>P</i> -Cho-GalpNAc (E <sup>term</sup> )                  | 5.08 [3.8] <sup>\S\S</sup><br>94.2                                                                                                                                                                                                                                                                                                      | 4.23-4.20*<br>49.9 | 3.82-3.78*<br>68.2 | 4.05-4.02*<br>68.6 | 4.00-3.96*<br>70.8                     | 4.08-4.04*<br>4.03-3.98*<br>65.4 [4.8] | 2.04<br>22.5<br>175.3 |
| Cho- <i>P</i> -(6- <i>O</i> $\rightarrow$ @ D, D <sup>term</sup> , E <sup>term</sup> )                  | 4.35-4.31*<br>60.1                                                                                                                                                                                                                                                                                                                      | 3.70-3.66*<br>66.6 | 3.23<br>54.5       |                    |                                        |                                        |                       |
| Cho- <i>P</i> -(6- <i>O</i> $\rightarrow$ @ E)                                                          | 4.30-4.26*<br>60.0                                                                                                                                                                                                                                                                                                                      | 3.68-3.65*<br>66.6 | 3.23<br>54.5       |                    |                                        |                                        |                       |
| $^{31}\text{P}$                                                                                         | <i>P</i> -5 <sup>C</sup> /6 <sup>B/B'</sup> 1.91; <i>P</i> -6 <sup>D/D(term)</sup> /CH <sub>2</sub> O <sup>Cho</sup> 0.32; <i>P</i> -6 <sup>E(term)</sup> /CH <sub>2</sub> O <sup>Cho</sup> 0.11; <i>P</i> -6 <sup>E</sup> /CH <sub>2</sub> O <sup>Cho</sup> -0.16; <i>P</i> -1 <sup>A'</sup> /6 <sup>MurNAc</sup> -1.08, -1.16, -1.26. |                    |                    |                    |                                        |                                        |                       |



**Supplementary Table 2. Primer, strains, and antibodies used in this study**

| Primer             | Sequence 5` - 3`                        | Restriction site |
|--------------------|-----------------------------------------|------------------|
| SPD1672_OLup_for   | GCGCGCGCATGCTTGGAGTAGTAGATGTCAAGGATATCC | <i>SphI</i>      |
| SPD1672_OLdwn_rev  | GCGCGCGAGCTCGATTTTTTTTCATTTTCTACTCCTCTG | <i>SacI</i>      |
| InvrevKpnI SPD1672 | GCGCGCGGTACCAATGAATCCTTTCTCTCCAATCTGC   | <i>KpnI</i>      |
| InvforPstI SPD1672 | GCGCGCCTGCAGGTTTTATAAGTTTCAAATCTTCTACC  | <i>PstI</i>      |
| InvrevKpnIErm      | GCGCGCGGTACCACGGTTCGTGTTCTGTGCTGACTTGC  | <i>KpnI</i>      |
| InvforPstIErm      | GCGCGCCTGCAGGTAGGCGCTAGGGACCTCTTTAGC    | <i>PstI</i>      |
| 1672_com_for       | GCGCCCATGGCGAAATCAATAGGCTTTATTG         | <i>NcoI</i>      |
| Spd1672_com_rev    | GCGCAAGCTTTTAATCCGTCATGTCGGATAC         | <i>HindIII</i>   |
| qP_tacL_F          | CGAACTGCCTTCTCTGCTAT                    |                  |
| qP_tacL_R          | TAAGCCAAAAGGCCTTCCAG                    |                  |
| EnoRT_F            | CGGACGTGGTATGGTTCCA                     |                  |
| EnoRT_R            | TAGCCAATGATAGCTTCAGCA                   |                  |

| Strains                                                               | Resistance                                           | Source of Reference                       |
|-----------------------------------------------------------------------|------------------------------------------------------|-------------------------------------------|
| E2 <i>E. coli</i> DH5 $\alpha$                                        | None                                                 | Bethesda Research Labs, Gaithersburg, USA |
| E5 <i>E. coli</i> DH5 $\alpha$ pUC18                                  | Amp <sup>R</sup>                                     | ThermoFisher (#SD0051)                    |
| 1046 <i>E. coli</i> DH5 $\alpha$ pUC18 $\Delta$ tacL                  | Amp <sup>R</sup> , Erm <sup>R</sup>                  | This work                                 |
| 1058 <i>E. coli</i> DH5 $\alpha$ pBAV-tacL                            | Cm <sup>R</sup>                                      | This work                                 |
| SP257 <i>S. pneumoniae</i> D39                                        | None                                                 | NCTC7466                                  |
| PN111 <i>S. pneumoniae</i> D39 $\Delta$ cps                           | Km <sup>R</sup>                                      | 1                                         |
| PN220 <i>S. pneumoniae</i> D39 $\Delta$ cps $\Delta$ lgt              | Km <sup>R</sup> , Erm <sup>R</sup>                   | 2                                         |
| PN602 <i>S. pneumoniae</i> D39 $\Delta$ tacL                          | Erm <sup>R</sup>                                     | This work                                 |
| PN601 <i>S. pneumoniae</i> D39 $\Delta$ cps $\Delta$ tacL             | Km <sup>R</sup> , Erm <sup>R</sup>                   | This work                                 |
| PN635 <i>S. pneumoniae</i> D39 $\Delta$ tacL pBAV-tacL                | Erm <sup>R</sup> , Cm <sup>R</sup>                   | This work                                 |
| PN634 <i>S. pneumoniae</i> D39 $\Delta$ cps $\Delta$ tacL pBAV-tacL   | Km <sup>R</sup> , Erm <sup>R</sup> , Cm <sup>R</sup> | This work                                 |
| PN149 <i>S. pneumoniae</i> D39lux                                     | Km <sup>R</sup>                                      | 3                                         |
| PN642 <i>S. pneumoniae</i> D39lux $\Delta$ tacL                       | Km <sup>R</sup> , Erm <sup>R</sup>                   | This work                                 |
| PN259 <i>S. pneumoniae</i> TIGR4 $\Delta$ cps                         | Km <sup>R</sup>                                      | 4                                         |
| PN603 <i>S. pneumoniae</i> TIGR4 $\Delta$ cps $\Delta$ tacL           | Km <sup>R</sup> , Erm <sup>R</sup>                   | This work                                 |
| PN636 <i>S. pneumoniae</i> TIGR4 $\Delta$ cps $\Delta$ tacL pBAV-tacL | Km <sup>R</sup> , Erm <sup>R</sup> , Cm <sup>R</sup> | This work                                 |
|                                                                       |                                                      | This work                                 |
| <b>Plasmids</b>                                                       |                                                      |                                           |
| pUC18tacL                                                             | Amp <sup>R</sup> , Erm <sup>R</sup>                  | This work                                 |
| pBAV1C-pE                                                             | Cm <sup>R</sup>                                      | This work                                 |
| pBAV-tacL                                                             | Cm <sup>R</sup>                                      | This work                                 |
| pTP1                                                                  | Km <sup>R</sup> , Erm <sup>R</sup> ,                 | 5                                         |

| Antibodies                                              | Dilution | Origin | Reference or source |
|---------------------------------------------------------|----------|--------|---------------------|
| Goat Anti-Mouse IgG H&L (Alexa Fluor <sup>®</sup> 488)  | 1:500    | Goat   | Abcam (#ab150113)   |
| Goat Anti-Rabbit IgG H&L (Alexa Fluor <sup>®</sup> 488) | 1:500    | Goat   | Abcam (#ab150077)   |
| Goat Anti-Rat IgG H&L (Alexa Fluor <sup>®</sup> 488)    | 1:2000   | Goat   | Abcam (#ab150157)   |
| IRDye <sup>®</sup> 800CW Goat $\alpha$ -mouse IgG       | 1:15000  | Goat   | LI-COR              |
| IRDye <sup>®</sup> 680RD Goat $\alpha$ -rabbit IgG      | 1:15000  | Goat   | LI-COR              |
| Polyclonal PspC-SH13 - IgG                              | 1:500    | Mouse  | This work           |
| Polyclonal Pce - IgG                                    | 1:500    | Mouse  | This work           |
| Polyclonal CbpL - IgG                                   | 1:500    | Mouse  | 6                   |
| Polyclonal CbpG - IgG                                   | 1:500    | Rabbit | This work           |
| Polyclonal CbpJ - IgG                                   | 1:500    | Rabbit | This work           |
| Polyclonal LytA - IgG                                   | 1:500    | Mouse  | This work           |

|                                          |         |        |                                                         |
|------------------------------------------|---------|--------|---------------------------------------------------------|
| Polyclonal PspA-QP2 - IgG                | 1:500   | Mouse  | This work                                               |
| Polyclonal Enolase serum                 | 1:25000 | Rabbit | <sup>7</sup>                                            |
| Kappa murine myeloma clone TEPC 15 – IgA | 1:500   | Mouse  | Sigma (#M1421)                                          |
| Monoclonal Forssman IgG                  | 1:250   | Rat    | Provided by J. Müthing, Münster, Germany <sup>2,8</sup> |
| Polyclonal $\alpha$ -pneu IgG            | 1:500   | Rabbit | Dauids Biotechnologie GmbH                              |

**Supplementary Table 3. Summary of variants in genome sequence data of *S. pneumoniae* D39 $\Delta$ *cps* $\Delta$ *tacl*.<sup>a</sup>**

| <i>S. pn.</i> D39 reference base position | <i>S. pn.</i> D39 reference base | Type             | <i>S. pn.</i> D39 $\Delta$ <i>cps</i> $\Delta$ <i>tacl</i> Base | Predicted effect | Gene            | Function                 |
|-------------------------------------------|----------------------------------|------------------|-----------------------------------------------------------------|------------------|-----------------|--------------------------|
| 423440                                    | A                                | SNP <sup>b</sup> | G                                                               | unknown          | intergenic      | no feature annotated     |
| 780272                                    | A                                | SNP <sup>b</sup> | G                                                               | Asp297Gly        | <i>spd_0768</i> | AI-2E family transporter |
| 1211772                                   | C                                | SNP <sup>b</sup> | T                                                               | Ala141Thr        | <i>spd_1179</i> | lanthionine synthetase   |
| 1258973                                   | C                                | SNP <sup>b</sup> | T                                                               | unknown          | intergenic      | no feature annotated     |

<sup>a</sup>Table shows all variations in genome sequence data of *S. pneumoniae* D39 $\Delta$ *cps* $\Delta$ *tacl* (*S. pn.* D39 $\Delta$ *cps* $\Delta$ *tacl*) in comparison to its parental strain identified by mapping of the sequence reads to the *S. pneumoniae* (*S.pn.*) D39 genome sequence [NC\_008533]. Raw sequence data of this study have been submitted to the Short Read Archive (SRA) of the European Nucleotide Archive ENA [RJE18558].

<sup>b</sup>SNP, single nucleotide polymorphism.

**Supplementary Table 4. Summary of variants in genome sequence data of *S. pneumoniae* TIGR4Δ*cpsΔtacl*.<sup>a</sup>**

| <i>S. pn.</i> TIGR4 reference base position | <i>S. pn.</i> TIGR4 reference base | Type             | <i>S. pn.</i> TIGR4 Δ <i>cpsΔtacl</i> Base | Predicted effect     | Gene                           | Function              |
|---------------------------------------------|------------------------------------|------------------|--------------------------------------------|----------------------|--------------------------------|-----------------------|
| 1593439                                     | CTTTTT<br>TTTTTA                   | DEL <sup>b</sup> | CTTTTT<br>TTTTTA                           | unknown              | intergenic                     | no feature annotated  |
| 1798175                                     | G                                  | SNP <sup>c</sup> | T                                          | unknown              | Intergenic                     | no feature annotated  |
| 1798221                                     | TAAAAAAT                           | INS <sup>d</sup> | TAAAAAAT                                   | unknown              | intergenic                     | no feature annotated  |
| 1799483*                                    | A                                  | SNP <sup>c</sup> | T <sup>#</sup>                             | Leu46Gln             | <i>sp_rs12410</i> <sup>§</sup> | pseudogene            |
| 1799605*                                    | A                                  | SNP <sup>c</sup> | T <sup>#</sup>                             | Tyr5stop             | <i>sp_rs12410</i> <sup>§</sup> | pseudogene            |
| 1799605*                                    | A                                  | SNP <sup>c</sup> | T <sup>#</sup>                             | Ser479Thr            | <i>sp_1894</i>                 | sucrose phosphorylase |
| 1799744*                                    | T                                  | SNP <sup>c</sup> | C                                          | Glu432Glu            | <i>sp_1894</i>                 | sucrose phosphorylase |
| 1799932*                                    | T                                  | SNP <sup>c</sup> | C                                          | Ile370Val            | <i>sp_1894</i>                 | sucrose phosphorylase |
| 1826271*                                    | TCC                                | DEL <sup>b</sup> | TC                                         | Asn22fs <sup>e</sup> | <i>sp_1914</i>                 | membrane protein      |

<sup>a</sup>Table shows all variations in genome sequence data of *S. pneumoniae* TIGR4Δ*cpsΔtacl* (*S. pn.* TIGR4Δ*cpsΔtacl*) in comparison to its parental strain identified by mapping of the sequence reads to the *S. pneumoniae* (*S.pn.*) TIGR4 genome sequence [NC\_003028.3]. Raw sequence data of this study have been submitted to the Short Read Archive (SRA) of the European Nucleotide Archive ENA [RJEB18558].

<sup>b</sup>DEL, deletion.

<sup>c</sup>SNP, single nucleotide polymorphism.

<sup>d</sup>INS, insertion.

<sup>e</sup>fs, frameshift

\*SNPs were verified by PCR amplification of the corresponding gene region, cloning of the PCR product into plasmid pMiniT™ (Promega) followed by DNA sequencing.

<sup>#</sup>SNPs could be excluded by PCR amplification of the corresponding gene region, cloning of the PCR product into plasmid pMiniT™ (Promega) followed by DNA sequencing.

<sup>§</sup>RefSeq annotation NC\_003028.3 was generated using the automatic NCBI Prokaryotic Genome Annotation Pipeline 4.1, which indicates *sp\_rs12410* as pseudogene that harbors in the published DNA sequence an internal stop codon at position 1799572-1799574.

## Supplementary References

1. Rennemeier, C. et al. Thrombospondin-1 promotes cellular adherence of Gram-positive pathogens *via* recognition of peptidoglycan. *Faseb J* **21**, 3118–3132 (2007).
2. Gisch, N. et al. Structural reevaluation of *Streptococcus pneumoniae* lipoteichoic acid and new insights into its immunostimulatory potency. *J Biol Chem* **288**, 15654–15667 (2013).
3. Jensch, I. et al. PavB is a surface-exposed adhesin of *Streptococcus pneumoniae* contributing to nasopharyngeal colonization and airways infections. *Mol Microbiol* **77**, 22–43 (2010).
4. Schulz, C. et al. Regulation of the arginine deiminase system by ArgR2 interferes with arginine metabolism and fitness of *Streptococcus pneumoniae*. *MBio* **5**, e01858-14 (2014).
5. Saleh, M. et al. Molecular architecture of *Streptococcus pneumoniae* surface thioredoxin-fold lipoproteins crucial for extracellular oxidative stress resistance and maintenance of virulence. *EMBO Mol Med* **5**, 1852–1870 (2013).
6. Gutiérrez-Fernández, J. et al. Modular architecture and unique teichoic acid recognition features of choline-binding protein L (CbpL) contributing to pneumococcal pathogenesis. *Sci Rep* **6**, 38094 (2016).
7. Hammerschmidt, S. et al. The host immune regulator factor H interacts via two contact sites with the PspC protein of *Streptococcus pneumoniae* and mediates adhesion to host epithelial cells. *J Immunol* **178**, 5848–5858 (2007).
8. Müthing, J. et al. Promiscuous Shiga toxin 2e and its intimate relationship to Forssman. *Glycobiology* **22**, 849–862 (2012).
